# Supplementary material for: Dissection of Besnoitia besnoiti intermediate host life cycle stages: From morphology to gene expression
Source: PLoS Pathog. 2022 Nov 17;18(11):e1010955. doi: 10.1371/journal.ppat.1010955 (PMC9714946; doi:10.1371/journal.ppat.1010955)
Supplement: S6 Table — (XLSX) [file ppat.1010955.s011.xlsx]

## Sheet: Contents
S6 Table B. besnoiti synthenic orthologues of T. gondii GRA genes
A	T. gondii genes coding for dense granule (GRA) proteins with corresponding B. besnoitia orthologues

## Sheet: A
T. gondii Gene ID	Gene Name	Product Description	EES1 (TPM)	EES2 (TPM)	EES3 (TPM)	EES4 (TPM)	EES5 (TPM)	Tachyzoites (TPM)	Tissue cysts (TPM)	Oocysts day 0 (TPM)	Oocysts day 4 (TPM)	Oocysts day 10 (TPM)	B. besnoiti gene ID	Tachyzoites (TPM)	Tissue cysts (TPM)
TGME49_247440	GRA33	hypothetical protein	1.51	0.7	0.88	0.86	0.75	310.48	345.52	0.14	2.73	3.59	BESB_005750	908.38	936.16
TGME49_232000	GRA30	hypothetical protein	78.45	84.74	86.58	92.86	84.98	204.23	210.17	0	73.99	115.99	BESB_009510	73.91	60.63
TGME49_237880	GRA13	hypothetical protein	492.26	325.52	359.85	286.44	270.12	1139.15	423.16	0.03	1.89	2.23	BESB_016050	339.7	1.36
TGME49_290700	GRA25	hypothetical protein	0.93	0.75	0.95	1.27	0.96	256.7	254.94	0	329.5	470.88	BESB_019710	611.63	164.08
TGME49_289380	GRA39	hypothetical protein	80.73	63.8	69.06	70.83	41.56	225.27	60.87	0.11	2.42	10.79	BESB_020540	101.81	124.09
TGME49_288840	GRA18	hypothetical protein	0	0.52	0.1	0.24	0.15	63.29	25.62	0.06	6.66	31.81	BESB_021120	12.33	229.1
TGME49_208070	N/A	inositol polyphosphate kinase	12.13	8.18	12.81	12.93	12.43	18.4	6.65	2.23	3.82	20.81	BESB_022730	13.22	14.36
TGME49_208450	PI2	protease inhibitor PI2	1.84	1.37	1.22	1.4	1.91	564.12	1090.25	0.23	2168.94	2254.55	BESB_022910	478.91	899.12
TGME49_251540	GRA9	dense granule protein GRA9	64.81	106.84	149.86	125.34	94.97	614.14	1319.78	2.97	51.25	178.38	BESB_028980	1126.66	7390.25
TGME49_275860	GRA12-related	hypothetical protein	0	0.6	0.15	0.24	0.15	395.81	171.26	0.02	47.69	185.7	BESB_029980	7947.97	971.83
TGME49_275850	GRA12-related	dense granule protein GRA12	209.96	318.78	414.47	307.45	188.04	0.51	0.31	0.04	2.12	3.88	BESB_029990	136.82	52.61
TGME49_237015	GRA43	hypothetical protein	20.24	14.31	17.78	17.6	11.39	789.98	994.71	2.55	365.42	422.09	BESB_036360	2083.56	725.56
TGME49_236870	GRA42	hypothetical protein	1.36	0.88	0.69	1.19	0.49	963.27	1506.16	4.54	1098.2	971.96	BESB_036500	966.16	261.56
TGME49_217680	GRA57	hypothetical protein	22.96	17.55	24.13	25.83	15.97	124.96	80.02	0.01	118.19	178.41	BESB_038650	244.81	53.9
TGME49_219810	GRA40	hypothetical protein	7.23	17.14	26.27	19.21	7.82	113.64	67.93	0.05	7.93	36.73	BESB_040360	736.99	228.59
TGME49_319340	GRA52	hypothetical protein	144.43	122.31	109.91	128.14	81.95	351.14	286.45	2.75	21.79	24.16	BESB_044420	69.05	275.71
TGME49_213067	GRA36	hypothetical protein	2.5	2.22	1.09	1.35	1.99	240.21	478.89	0.08	38.1	23.09	BESB_047090	310.32	256.62
TGME49_268900	GRA10	dense granular protein GRA10	29.04	29.42	42.48	35.4	42.52	34.04	18.2	5.57	33.69	71.08	BESB_052150	12.48	18.54
TGME49_269690	GRA29	hypothetical protein	97.59	94.84	136.12	116.13	49.19	205.7	160.83	0.07	1.47	14.14	BESB_053000	1344.2	550.43
TGME49_270250	GRA1	dense granule protein GRA1	25.55	13.46	8.13	0.87	1.63	16578.2	12896.7	3.1	4874.63	11174.6	BESB_053370	42945.2	6744.19
TGME49_212300	GRA32	hypothetical protein	58.77	55.09	58.64	61.28	42.48	201.99	121.36	0.02	26.89	76.86	BESB_055210	3.71	17.43
TGME49_228170	GRA44	inner membrane complex protein IMC2A	6.71	7.65	12.23	11.21	10.62	117.68	88.77	0.06	164.76	309.96	BESB_058770	329.89	115.95
TGME49_227620	GRA2	dense granule protein GRA2	15	5.48	4.09	0.5	0.45	7404.27	6067.6	0.07	269.54	625.62	BESB_059210	15773.3	5220.74
TGME49_226380	GRA35	hypothetical protein	1.47	0.65	0.93	0.74	1.58	251.65	193.98	0.01	440.52	948.95	BESB_060230	391.28	109.26
TGME49_297880	GRA23	dense granule protein DG32	1770.33	1443.78	1000.36	1253.92	686.79	523.19	202.05	0.16	0.91	5.45	BESB_063600	147.04	127.76
TGME49_200360	N/A	hypothetical protein	0.27	2.01	1.96	3.06	3.84	1115.04	839.39	0.1	635.52	1010.36	BESB_064490	945.46	37.88
TGME49_204340	GRA54, CST8	hypothetical protein	0.49	0.12	0.14	0.05	0.11	237.48	213.76	0.1	103.22	181.42	BESB_065050	0.68	558.98
TGME49_203600	GRA50	hypothetical protein	408.82	285.83	230.14	275.87	160.28	91.38	71.69	0.25	0.55	1.35	BESB_065660	230.35	35.48
TGME49_203310	GRA7	dense granule protein GRA7	24.7	93.3	104.54	98.15	30.24	1795.04	2272.2	0.07	526.98	1699.6	BESB_065910	15738.6	4406.94
TGME49_309760	GRA55	hypothetical protein	2.09	0.93	0.9	1.33	1.17	291.36	411.5	1.14	99.89	192.86	BESB_070340	431.2	309.07
TGME49_308970	GRA12-related	hypothetical protein	25.06	43.35	42.2	44.35	77.09	406.39	180.41	0.12	75.84	94.22	BESB_070870	5131.4	731.39
TGME49_309930	GRA56	melibiase subfamily protein	1.36	0.63	0.67	1.86	3.36	262.97	573.04	2.73	2.69	3.56	BESB_071320	44.81	765.49
TGME49_312420	GRA38	hypothetical protein	30.6	24.39	32.81	30.93	20.82	143.25	43.22	0	16.48	91.67	BESB_073590	317.67	103.23
TGME49_316250	GRA45	hypothetical protein	18.49	24.03	24.45	28.98	24.08	296.01	183.59	5.19	172.16	208.29	BESB_078480	821.3	212.74
TGME49_222170	GRA17	dense-granule antigen DG32	754.68	707.33	686.63	669.6	407.29	245.79	107.61	13.33	1.82	11.45	BESB_079870	3081.95	232.9
TGME49_220890	GRA12-related	hypothetical protein	0	0.36	0.27	0.62	0.58	99.18	138.41	0.35	152.54	117.83	BESB_080930	627.08	263.04
TGME49_239740	GRA14	dense granule protein GRA14	10.57	25.26	33.05	35.15	83.57	714.92	537.52	0.14	543.16	693.21	BESB_082550	1839.13	423.22
TGME49_260520	GRA53, CST6	hypothetical protein	74.44	74.45	89.4	84.43	47.23	194.72	194.08	0.18	43.69	48.62	BESB_085220	362.64	316.43
TGME49_212410	GRA11A	dense granule protein GRA11	108.46	138.69	225.94	197.3	85.46	1.33	2.3	0	4.81	3.1	NA	NA	NA
TGME49_237800	GRA11B	dense granule protein GRA11	584.88	656.02	970.25	838.23	496.22	0.3	2.83	0.03	12.73	9.69	NA	NA	NA
TGME49_288650	GRA12	dense granule protein GRA12	3.33	1.69	1.22	0.71	0.47	1537.75	1575.93	0.15	465.18	1031.34	NA	NA	NA
TGME49_275470	GRA15	dense granule protein GRA15	0.08	0.17	0.27	0.24	0.29	99.88	2.02	0.02	6.65	69.09	NA	NA	NA
TGME49_208830	GRA16	hypothetical protein	0.63	0.39	0.52	0.78	0.88	187.16	44.84	0	0.65	9.98	NA	NA	NA
TGME49_200010	GRA20	hypothetical protein	0.26	0.14	0.07	0.08	0.04	189.77	169.01	0.33	1.33	14.28	NA	NA	NA
TGME49_241610	GRA21	hypothetical protein	10.75	10.76	19.81	15.49	25.92	96.56	30.91	0	6.43	29.09	NA	NA	NA
TGME49_215220	GRA22	hypothetical protein	1.99	0.56	0.47	0.37	0.38	541.76	314.9	0.36	675.66	391.16	NA	NA	NA
TGME49_230180	GRA24	hypothetical protein	2.44	21.59	29.53	44.26	153.55	335.95	26.62	9.92	167.88	375.29	NA	NA	NA
TGME49_231960	GRA28	omega secalin, putative	1	3.78	6.68	8.55	21.06	40.49	7.09	4.64	53.83	109.27	NA	NA	NA
TGME49_227280	GRA3	dense granule protein GRA3	4.92	1.25	1.56	0.12	0.23	2197.5	1584.46	0.11	3.11	37.81	NA	NA	NA
TGME49_220240	GRA31	hypothetical protein	0.54	0.2	0.27	0.07	0.01	161.27	76.3	0	6.01	28.12	NA	NA	NA
TGME49_203290	GRA34	hypothetical protein	2.98	1.34	1.55	1.85	0.91	575.87	1561.54	0.06	2.28	7.01	NA	NA	NA
TGME49_236890	GRA37	hypothetical protein	17.81	25.82	25.31	46.36	46.09	431.52	447.67	38.42	224.77	365.63	NA	NA	NA
TGME49_310780	GRA4	dense granule protein GRA4	4.75	2.18	1.04	1.29	0.53	2160.17	787.12	0.03	305.38	677.27	NA	NA	NA
TGME49_286450	GRA5	dense granule protein GRA5	22.11	12.91	12.49	6.16	8.29	8584.42	3946.9	2.7	506.79	1708.18	NA	NA	NA
TGME49_230705	GRA51, CST3	hypothetical protein	0	0.69	0.51	0.24	0.08	674.54	138.96	0	31.91	41.94	NA	NA	NA
TGME49_268790	GRA58	hypothetical protein	11.72	11.72	8.12	13.35	8.12	638.77	1248.18	4.03	0.7	4.54	NA	NA	NA
TGME49_275440	GRA6	dense granule protein GRA6	5.11	2.58	1.53	0.5	0.52	3479.73	2175.47	2.33	493.98	1029.52	NA	NA	NA
TGME49_254720	GRA8	dense granule protein GRA8	4.85	2.04	1.81	1.8	0.64	2123.26	443.03	0	353.71	779.69	NA	NA	NA
TGME49_277270	N/A	NTPase II	57.93	76.01	86.31	82.15	31.91	1009.17	251.02	0	0.59	6.42	NA	NA	NA
TGME49_277240	N/A	NTPase I	480.36	499.89	523.37	609.73	180.55	46.1	14.38	0	0	1.07	NA	NA	NA
TGME49_240060	N/A	TgIST	5.54817	2.95065	2.1579	1.87955	0.673527	4671.55	1506.07	51.6476	81.3129	7320.28	NA	NA	NA
TGME49_235140		TgNSM	78.5813	72.8888	88.1585	95.2956	175.865	1041.14	1422.23	320.592	729.059	7064.65	NA	NA	NA
TGME49_239010		TEEGR	163.267	179.504	255.748	78.0594	24.9205	882.881	22.5374	94.642	158.484	2911	NA	NA	NA
